# Supplementary material for: Threshold Switching in Forming-Free Anodic Memristors Grown on Hf–Nb Combinatorial Thin-Film Alloys
Source: MDPI journal article supplement (doi:10.3390/nano12223944), 2022-11-09
Supplement: s1 [file s1]

# Threshold Switching in Forming-Free Anodic Memristors Grown on Hf–Nb Combinatorial Thin-Film Alloys

Ivana Zrinski <sup>1</sup>, Janez Zavašnik <sup>2</sup>, Jiri Duchoslav <sup>3</sup>, Achim Walter Hassel <sup>1,4</sup> and Andrei Ionut Mardare <sup>1,\*</sup>

<sup>1</sup> Institute of Chemical Technology of Inorganic Materials, Johannes Kepler University Linz, Altenberger Street, 69, 4040 Linz, Austria

<sup>2</sup> Jožef Stefan Institute, Jamova Cesta 39, 1000 Ljubljana, Slovenia

<sup>3</sup> Center for Surface and Nanoanalytics, Johannes Kepler University Linz, Altenberger Street, 69, 4040 Linz, Austria

<sup>4</sup> Danube Private University, Steiner Landstrasse 124, 3500 Krems-Stein, Austria

\* Correspondence: andrei.mardare@jku.at

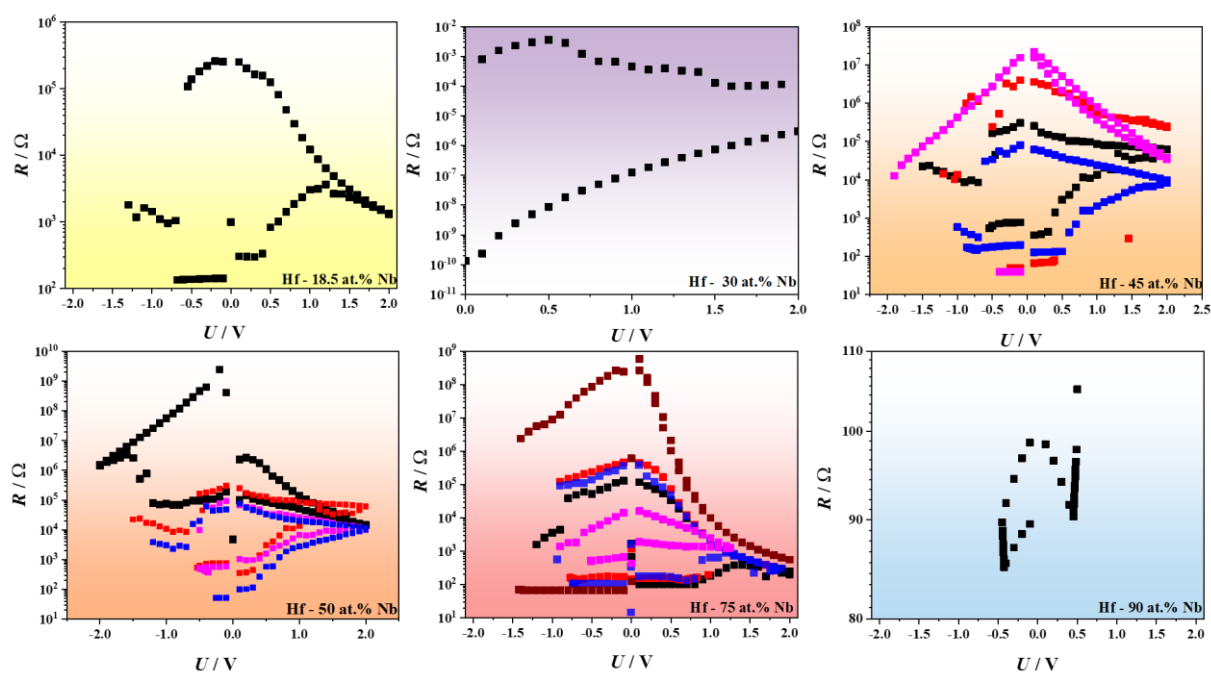

**Figure S1.** Representative  $R$ - $U$  sweeps along the Hf-Nb anodic memristors.

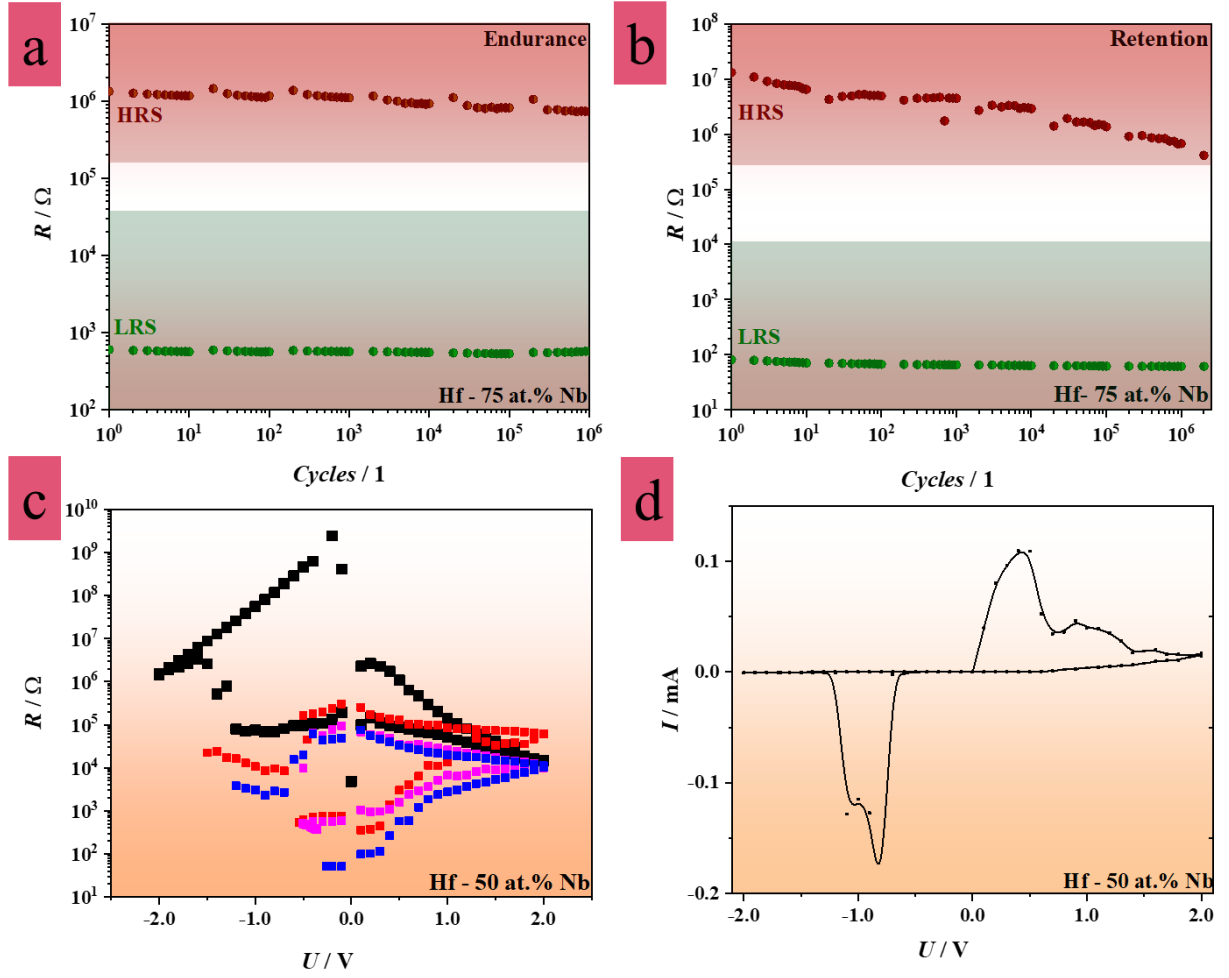

**Figure S2.** (a), (b), Endurance and retention measurements recorded for metal-insulator-metal (MIM) structures grown on Hf-75 at.%Nb alloys, (c)  $R-U$  sweeps for MIMs formed on Hf-50 at.%Nb, (d) representative  $I-U$  sweep recorded for MIMs formed on Hf-50 at.%Nb alloys.
